# Supplementary material
Source: publisher figshare collection journal article supplement (https://frontiersin.figshare.com/ndownloader/files/26819825)
Supplement: Supplementary file [file 26819825]

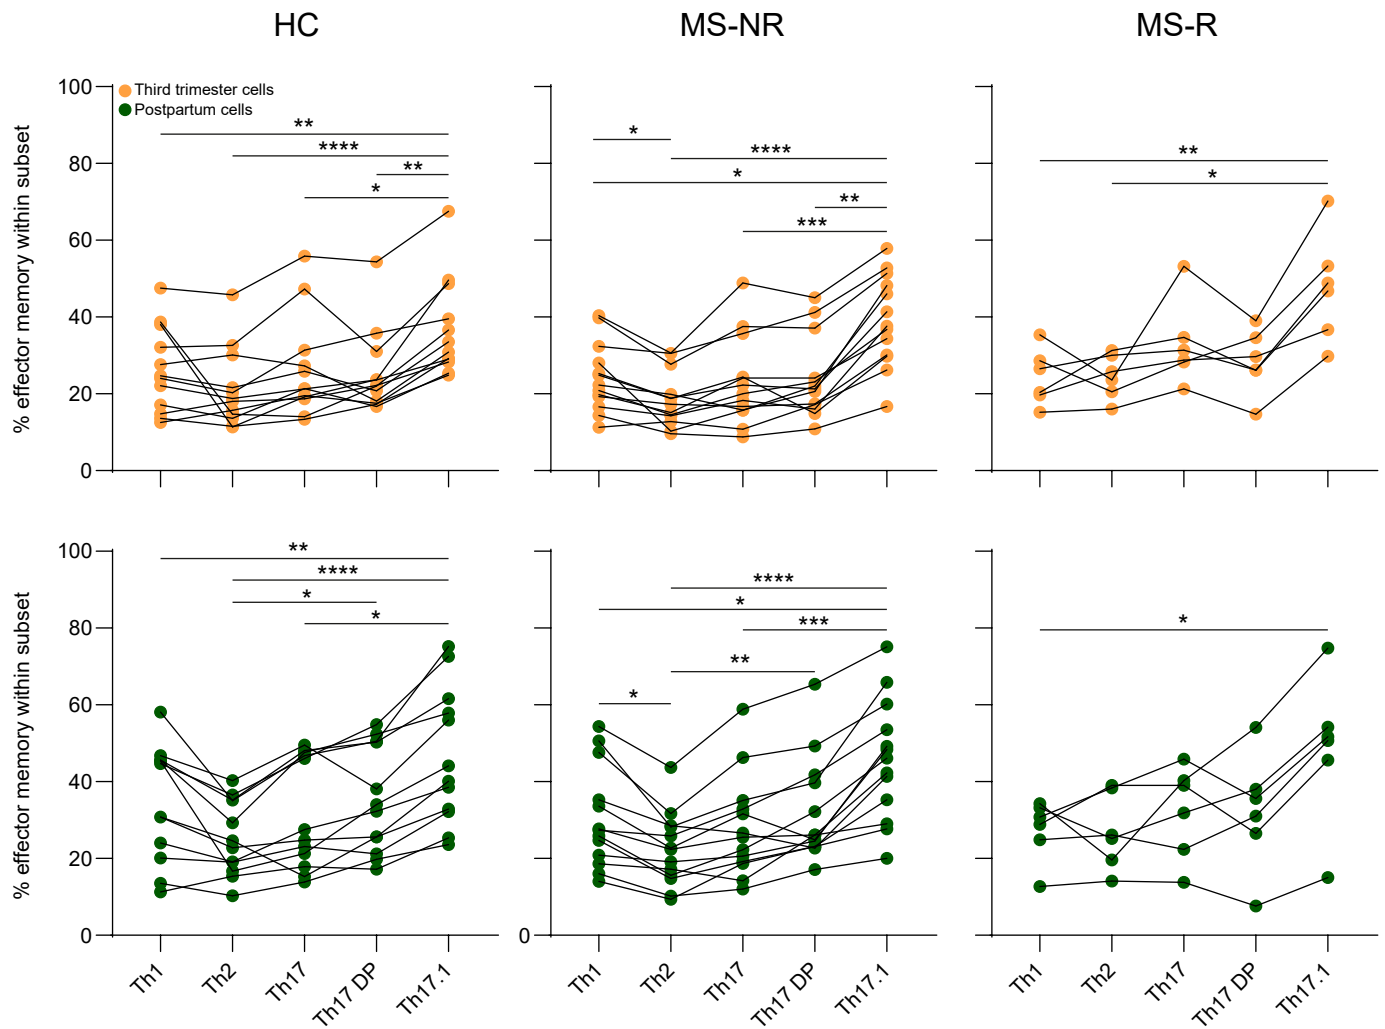

**Supplementary Figure 3.** Percentages within effector Th subsets from third trimester and early postpartum samples. Frequencies of effector memory cells within Th1, Th2, Th17, Th17 DP and Th17.1 subsets in third trimester and postpartum blood (HC,  $n = 12$ ; MS-NR,  $n = 13$  and MS-R,  $n = 6$ ). Data were compared using Kruskal-Wallis with Dunn's multiple comparison tests \* $p < 0.05$ , \*\* $p < 0.01$ , \*\*\* $p < 0.001$  and \*\*\*\* $p < 0.0001$ . 'HC' = healthy controls, 'MS-NR' = MS patients without a postpartum relapse, 'MS-R' = MS patients with a postpartum relapse.
